# Supplementary material for: Preparation of super-hydrophilic polyphenylsulfone nanofiber membranes for water treatment
Source: Royal Society of Chemistry journal article supplement (doi:10.1039/c8ra06493h), 2019-01-01
Supplement: c8ra06493h1.pdf [file c8ra06493h1.pdf]

## Supplementary information

### Preparation of super-hydrophilic polyphenylsulfone nanofiber membranes for water treatments

Yan Wang<sup>a,b</sup>, Radosław Górecki<sup>c,d</sup>, Eugen Stamate<sup>e</sup>, Kion Norrman<sup>e</sup>, David Aili<sup>e</sup>, Min Zuof, Weihong Guo<sup>a\*</sup>, Claus Hélix-Nielsen<sup>c\*</sup>, Wenjing Zhang<sup>e\*</sup>

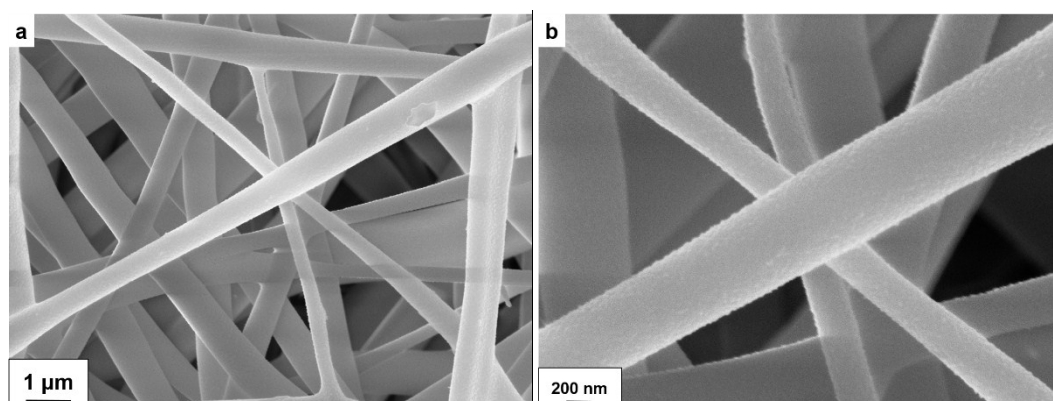

Fig. S1 SEM image of the plasma-treated PPSU ENM: (a) 35000X, (b) 100000X.

SEM images of the plasma-treated PPSU ENM are presented in Fig. S1. As shown in Fig. S1(a), plasma treatment induced no significant morphological changes of the porous network. Individual fibre structures remained mostly intact, although a few damages of the fibre surface could be observed. As shown in Fig. S1(b), the roughness of fibre surfaces increased after plasma treatment with little bumps in nanoscale appearing on the fibre surfaces. The oxygen plasma treatment has been reported to produce certain surface roughness by etching.<sup>1-4</sup> However, due to the short period of the plasma treatment, the etching effect on the PPSU fibres was limited.

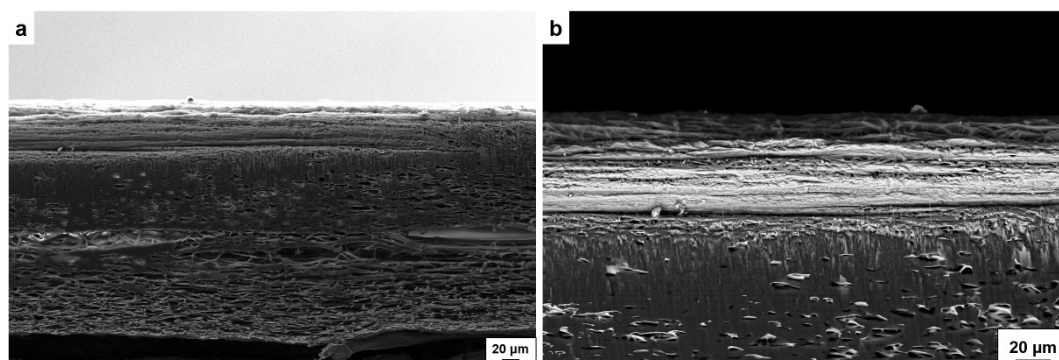

Fig. S2 SEM image of the cross section of the resulting TFNC FO membrane after FO tests: (a) 500X, (b) 1000X.

As shown in Fig. S2, SEM images of the cross section of the resulting TFNC FO membranes present a dense layer on top of the porous nanofibrous substrate. However, it is difficult to identify a clear boundary between polyamide active layer and PPSU ENM substrate. Due to the porous structure and high hydrophilicity of the substrate, the polyamide layer integrated into the nanofibrous

substrate, indicating good adhesion between them.

### References

1. K. Tsougeni, N. Vourdas, A. Tserepi, E. Gogolides and C. Cardinaud, *Langmuir : the ACS journal of surfaces and colloids*, 2009, **25**, 11748-11759.
2. H. S. Salapare, T. Darmanin and F. Guittard, *Applied Surface Science*, 2015, **356**, 408-415.
3. D. M. Correia, C. Ribeiro, G. Botelho, J. Borges, C. Lopes, F. Vaz, S. A. C. Carabineiro, A. V. Machado and S. Lanceros-Méndez, *Applied Surface Science*, 2016, **371**, 74-82.
4. H.-J. Kim, S. J. Park, C. S. Park, T.-H. Le, S. Hun Lee, T. H. Ha, H.-i. Kim, J. Kim, C.-S. Lee, H. Yoon and O. S. Kwon, *Chemical Engineering Journal*, 2018, **339**, 204-213.
